# Supplementary material for: Research on the carbon emissions reduction effects of China’s digital economy: moderating role of the national big data comprehensive pilot zone policy
Source: Frontiers journal article supplement (doi:10.3389/fenvs.2025.1523560), 2025-04-01
Supplement: Supplementary_file_1.docx [file Supplementary_file_1.docx]

Supplementary Material

**Paper Title:** Research on the Carbon Emissions Reduction Effects of China's Digital Economy: Moderating Role of the National Big Data Comprehensive Pilot Zone Policy

**Authors Information:**

Weicheng Xu [First author, Corresponding author]

Email Address: [xuweicheng@ouc.edu.cn](mailto:xuweicheng@ouc.edu.cn)

Tel: +86 15964238795

Information: (1984-), Associate Professor, Doctoral Supervisor, School of Economics, Ocean University of China, PhD in Economics; Researcher, Institute of Marine Development, Ocean University of China.

From 2012 to 2013, she studied in Université Paris I as visiting scholar. She graduated from the School of Economics of Shandong University in 2014, achieving doctoral degree in economics. From 2014 to 2016, she was engaged in postdoctoral research in the Institute of Finance of Shandong University. She has been working in the Department of Finance, School of Economics, Ocean University of China since 2016. In 2016 she was an assistant professor and master's supervisor, and promoted to associate professor and doctoral supervisor in 2019.

Her research interests include carbon trading, digital economy and environmental economy. She has published more than 50 papers in CSSCI/SSCI/SCI journals, such as Journal of *Financial Research*, *Nankai Economic Studies*, *World Economic Studies*, *China Soft Science*, *Sustainable Cities and Society*, *Economic Modelling*, *The Singapore Economic Review, Frontiers in Environmental Science, Energies,* and *Sustanability* et al. She has presided over more than 10 research projects, including the National Social Science Foundation Project, the Project of Humanities and Social Sciences Research of the Ministry of Education, the Natural Science Foundation Project of Shandong Province, the Social Science Planning Foundation Project of Shandong Province, and the China Postdoctoral Science Foundation Project et al. The above research achievements were awarded the Social Science Outstanding Achievement Award of Shandong Province, Humanities and Social Sciences Outstanding Achievement Award of Shandong Provincial University, and the Social Science Outstanding Achievement Award of Qingdao city et al.

Currently, she serves as a peer reviewer for the China Academy of Social Science Evaluation, and an anonymous reviewer for several CSSCI and SSCI journals, such as Journal of *Macro-Quality Research*, *Financial Regulation Research*, *Quarterly Journal of Finance*, *Business Economics and Management*, *Economic Modelling*, and *Economic Analysis and Policy*.

Wenqi Wan [Second author]

Email Address: [wanwenqi2022@163.com](mailto:wanwenqi2022@163.com)

Tel: +86 13970051074

Information: (1998-), Graduate student, School of Economics, Ocean University of China.

His research interests include carbon trading, digital economy and environmental economy. He has participated in several research projects, including the National Social Science Foundation Project, the Project of Humanities and Social Sciences Research of the Ministry of Education, and the Social Science Planning Foundation Project of Shandong Province.

**Abstract:**

The rapid growth of the digital economy brings significant potential to accomplish the “dual carbon” objectives in both China and the global economy. Fully considering how digital economy lowers emissions of carbon dioxide is critical for promoting high-quality economic growth. The research, from multiple dimensions of “production-side”, uses 30 provincial-level samples from 2012 to 2022 in China to systematically analyze the influence of the digital economy on carbon emissions, comprising the scale, structural, and technological effects. Additionally, it examines how the National Big Data Comprehensive Pilot Zone (NBDCPZ) policy influences the digital economy's role in carbon emissions. According to the findings of this paper: 1) Digital economy has a key role in lowering carbon emissions. The heterogeneity analysis shows that it is more effective in translating the digital economy's influence for lowering carbon emissions in eastern regions, and the reduction effort is more obvious in regions with abundant energy resources and higher digital economic development. 2) On the production-side, the mediating effects caused by technological progress and structural upgrading decrease emissions of carbon, while the mediating effects of scale expansion promote carbon emissions. The sum of former two effects outweighs the latter. 3) The moderation effect test reveals that the NBDCPZ policy further enhances the prohibitive influence of the digital economy on emissions. As nations all around the world placing a greater emphasis on sustainable development, this research provides understanding about how the digital economy achieves emission reduction targets.

**Keywords:**

Digital economy, Carbon emissions, Production-side, National Big Data Comprehensive Pilot Zone policy, Mediating effect, Moderating effect

**Acknowledgments:**

This paper is funded by the General Project of Humanities and Social Sciences Research of the Ministry of Education “Study on Mechanism Analysis, Effect Evaluation, and Countermeasure Research of Carbon Unlocking in Manufacturing Empowered by Digital Economy” (Project Approval Number: 23YJC790164).

**
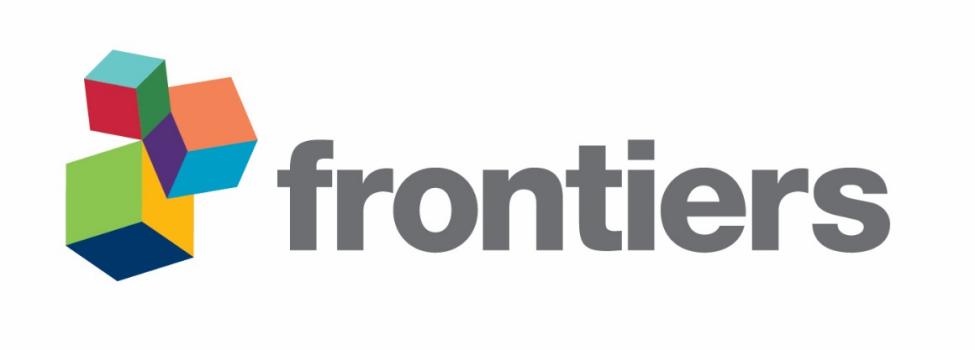
**
